# Supplementary material for: Magnetic solid-phase extraction using polydopamine-coated magnetic multiwalled carbon nanotube composites coupled with high performance liquid chromatography for the determination of chlorophenols
Source: Royal Society of Chemistry journal article supplement (doi:10.1039/d1an01113h), 2021-01-01
Supplement: d1an01113h1.pdf [file d1an01113h1.pdf]

## ***Electronic Supplementary Material***

### **Magnetic solid phase extraction using polydopamine coated magnetic multiwalled carbon nanotube composites coupled with high performance liquid chromatography for the determination of chlorophenols**

Wenhui Lu<sup>a\*</sup>, Fu Shanchao<sup>a</sup>, Sun xiaoze<sup>a</sup>, Jie Li<sup>ub</sup>, Deyi Zhu<sup>a</sup>, Jinhua Li<sup>b</sup>, Lingxin Chen<sup>b,c\*</sup>

<sup>a</sup> *School of Light Industry and Engineering, Qilu University of Technology (Shandong Academy of Sciences), Jinan 250353, China*

<sup>b</sup> *CAS Key Laboratory of Coastal Environmental Processes and Ecological Remediation, Yantai Institute of Coastal Zone Research, Chinese Academy of Sciences, Yantai 264003, China*

<sup>c</sup> *Center for Ocean Mega-Science, Chinese Academy of Sciences, Qingdao 266071, China.*

\* Corresponding authors.

*E-mails:* whlu@qlu.edu.cn (W. Lu); lxchen@yic.ac.cn (L. Chen)

## **Contents**

**Fig. S1.** Magnetic hysteresis loops of M-MWCNTs and PDA coated M-MWCNTs.

**Fig. S2.** TGA curves of M-MWCNTs (A) and PDA coated M-MWCNTs (B).

**Fig. S3.** Reusability of PDA coated M-MWCNTs for MSPE

**Table S1.** Magnetic parameters of M-MWCNTs and PDA coated M-MWCNTs.

**Table S2.** Comparison of this proposed method with reported MSPE-HPLC method for CPs in water samples

**Fig. S1.**

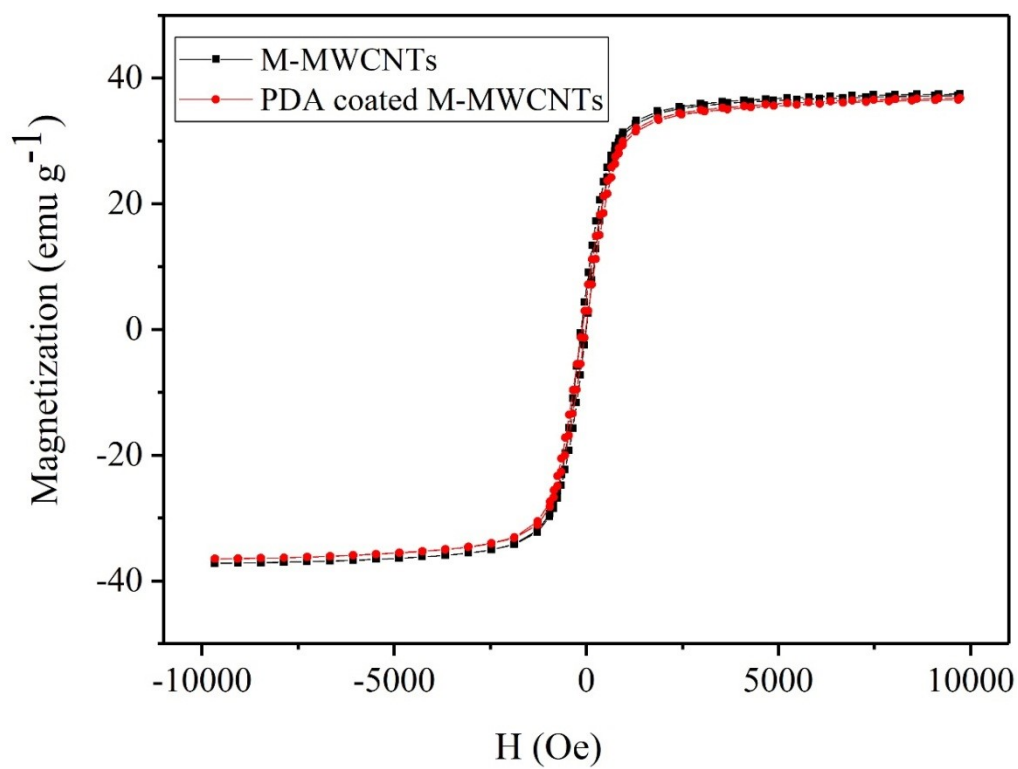

**Fig. S2.**

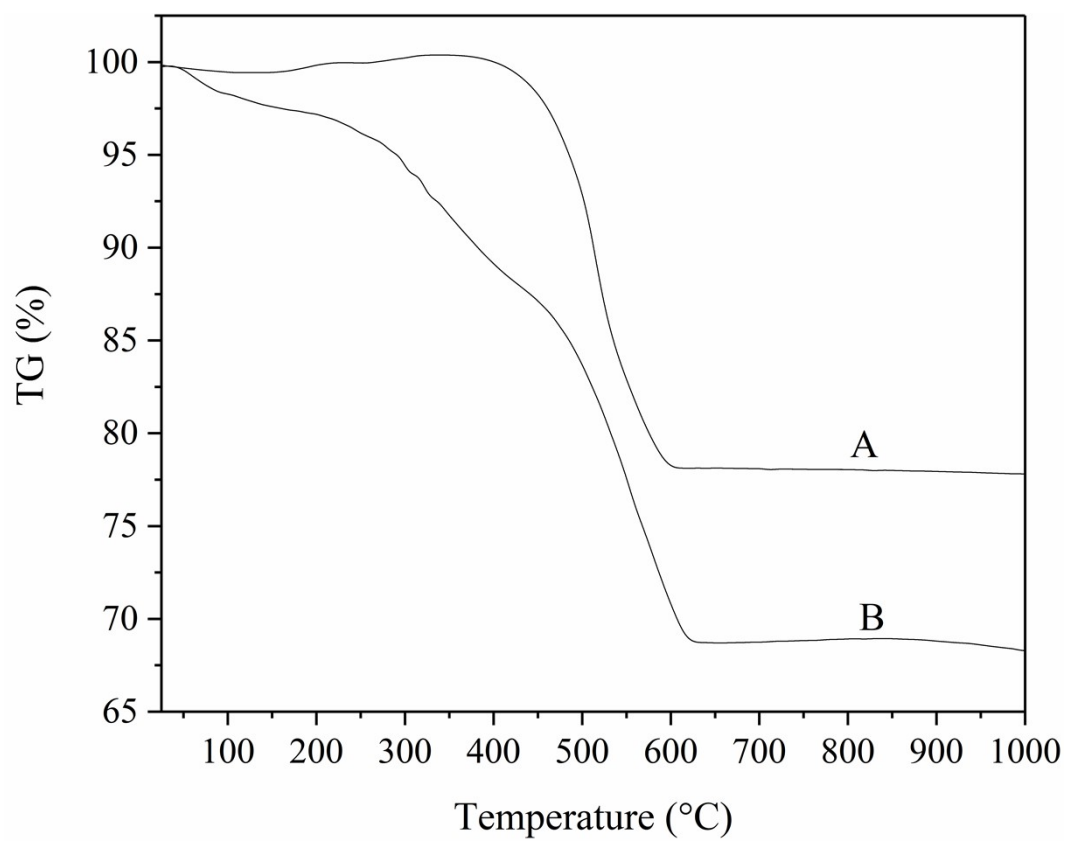

**Fig. S3.**

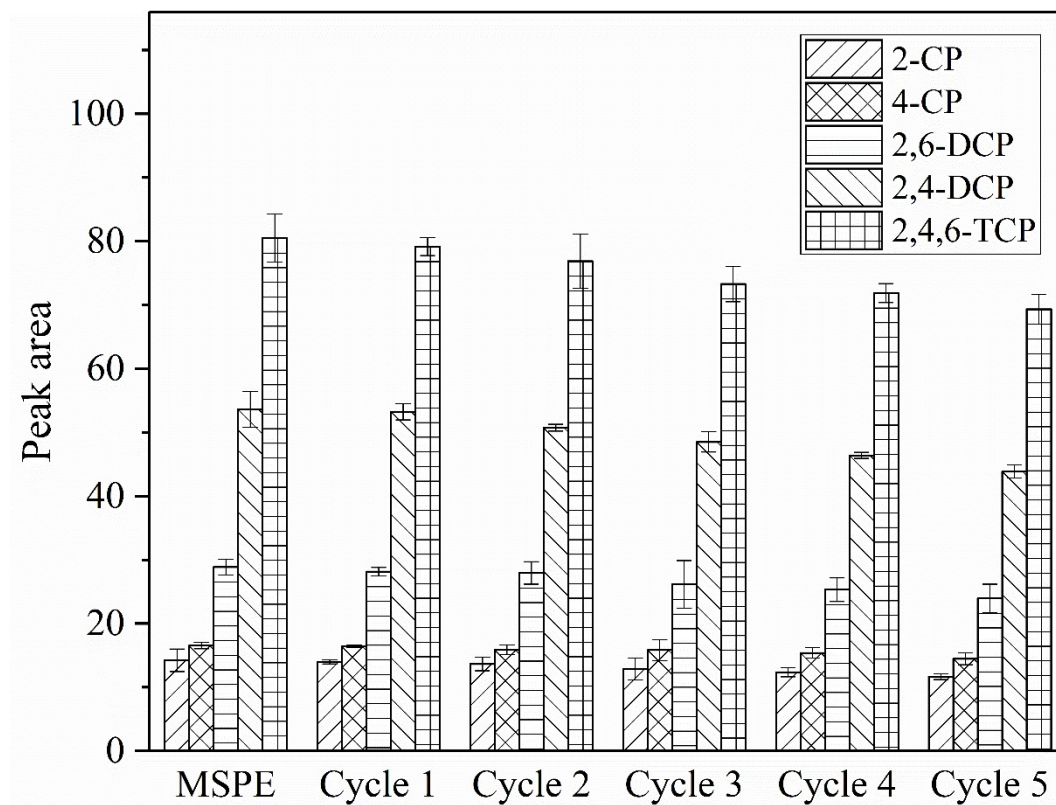

**Table S1.** Magnetic parameters of M-MWCNTs and PDA coated M-MWCNTs

| Adsorbents          | Saturation magnetization        | Residual magnetization          | Coercivity    |
|---------------------|---------------------------------|---------------------------------|---------------|
|                     | ( $M_s$ , emu g <sup>-1</sup> ) | ( $M_r$ , emu g <sup>-1</sup> ) | ( $H_c$ , Oe) |
| M-MWCNTs            | 37.5                            | 3.66                            | 63.8          |
| PDA coated M-MWCNTs | 36.8                            | 3.17                            | 44.8          |

**Table S2.** Comparison of this proposed method with reported MSPE-HPLC method for CPs in water samples

| Analyte                                     | Adsorbent                                           | Linear range ( $\mu\text{g L}^{-1}$ )                                 | LOD ( $\mu\text{g L}^{-1}$ ) | Recovery (%) | sample                                        | Ref.      |
|---------------------------------------------|-----------------------------------------------------|-----------------------------------------------------------------------|------------------------------|--------------|-----------------------------------------------|-----------|
| 4-CP, 2,4-DCP, 2,4,6-TCP, 2,3,5,6-TeCP, PCP | $\text{Fe}_3\text{O}_4@\text{SiO}_2@\text{IL-MIPs}$ | 500–50000                                                             | 50                           | 83.0–96.9    | seawater                                      | 38        |
| 2-CP, 2,4-DCP, 2,4,6-TCP                    | $\text{Fe}@\text{SiO}_2@\text{PANI}$                | 60–10000 for 2-CP,<br>40–10000 for 2,4-DCP,<br>90–10000 for 2,4,6-TCP | 10–30                        | 83.4–118.5   | river water, reservoir water, wastewater      | 39        |
| 2-CP, 4-CP, 2,3-CP, 3,4-CP                  | $\text{Fe}_3\text{O}_4@\text{C}$ nanocomposite      | 0.1–100                                                               | 0.01–0.03                    | 92.0–99.0    | lake water                                    | 40        |
| 2-CP, 3-CP, 2,3-DCP, 3,4-DCP                | magnetic porous carbon                              | 1.0–100.0                                                             | 0.10–0.12                    | 90.8–102.3   | mineral water                                 | 41        |
| 2-CP, 4-CP, 2,4-DCP, 2,4,5-TCP              | carbon-coated magnetic nanoparticles                | 500–20000                                                             | 140–430                      | 94.0–99.4    | tap water, industrial effluent, well water    | 42        |
| 2-CP, 4-CP, 2,4-DCP, 2,6-DCP, 2,4,6-TCP     | PDA coated M-MWCNTs                                 | 2.0–200 for 2-CP, 4-CP,<br>1.0–200 for 2,4-DCP, 2,6-DCP, 2,4,6-TCP    | 0.10–0.31                    | 76.87–106.5  | tap water, river water, lake water, sea water | This work |

Abbreviation: TeCP, tetrachlorophenol; IL, ionic liquid; PANI, polyaniline
